# Supplementary material
Source: ML conference proceedings conference paper supplement (https://aclanthology.org/2026.semeval-1.247)

Part 1. Data Augmentation

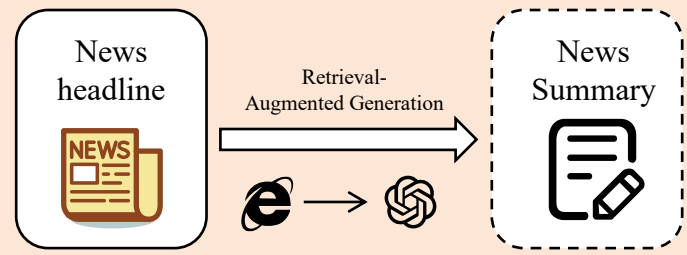

Part 2. Humor Generation Mode Unification

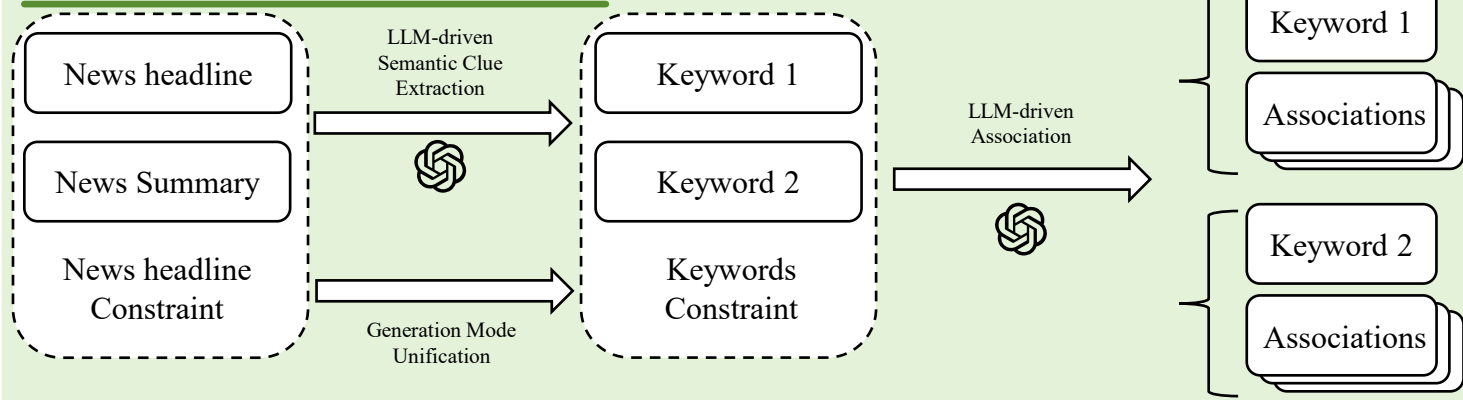

Part 3. LLM Generation Based on Multi-Source Semantic Inputs

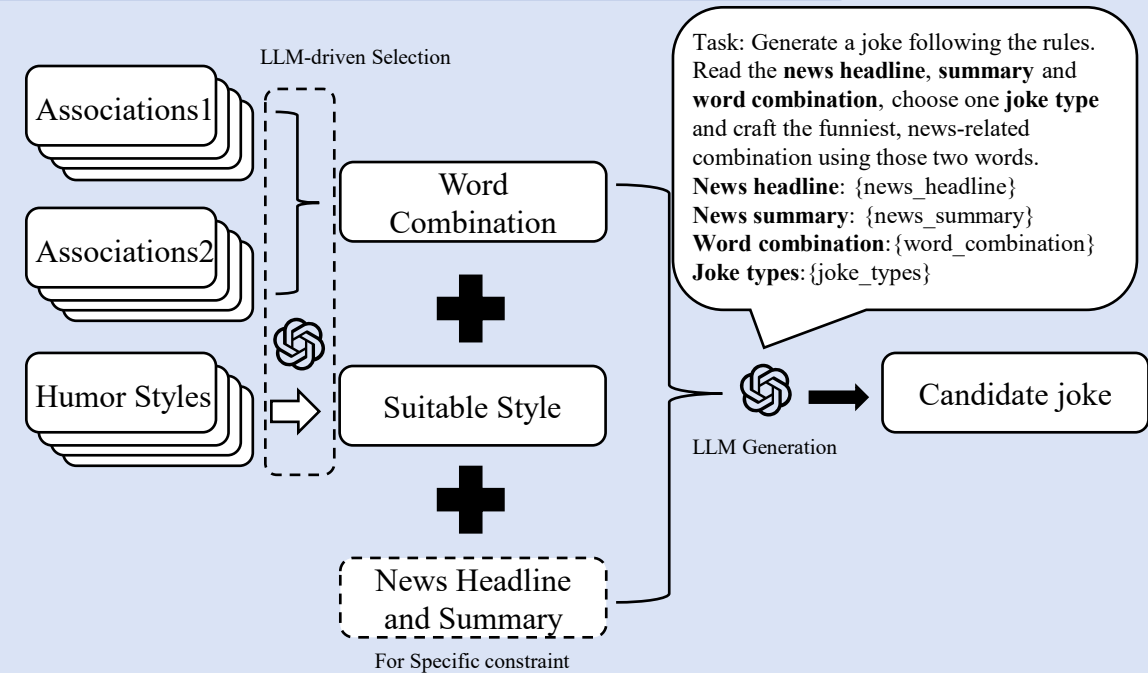

Part 4. Multi-Model Generation & Evaluation & Arbitration

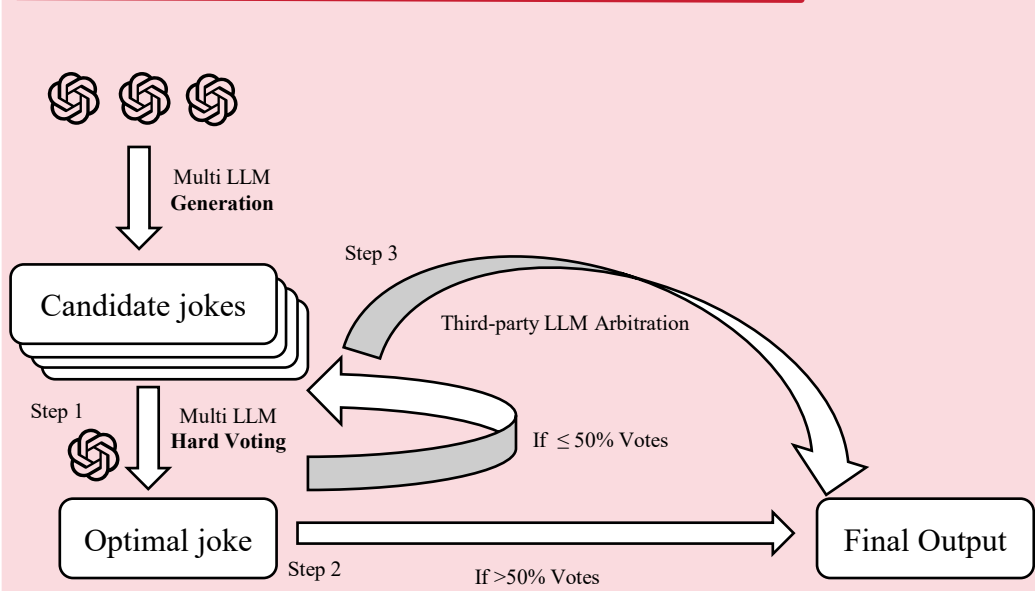

Supplement: SupplementaryMaterial [file humor-frame2.pdf › latex/fig/humor-frame2.pdf]
