# Supplementary material
Source: ML conference proceedings conference paper supplement (https://aclanthology.org/2026.semeval-1.247)

Part 1. Data Augmentation

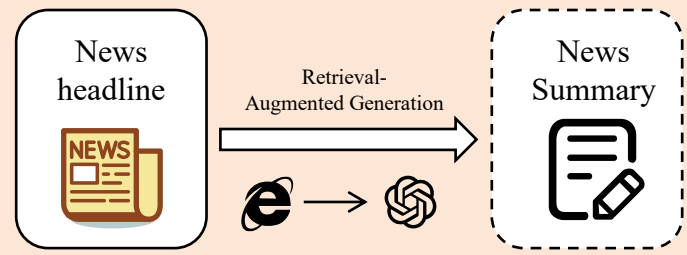

Part 2. Humor Generation Mode Unification

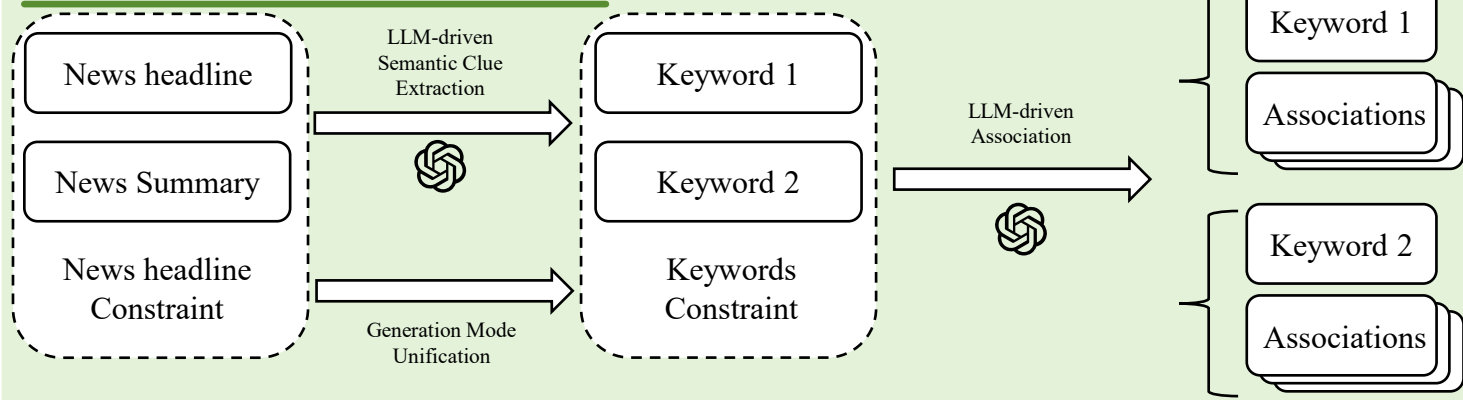

Part 3. Candidate Joke Generation Based on Multi-Source Semantic Constraints

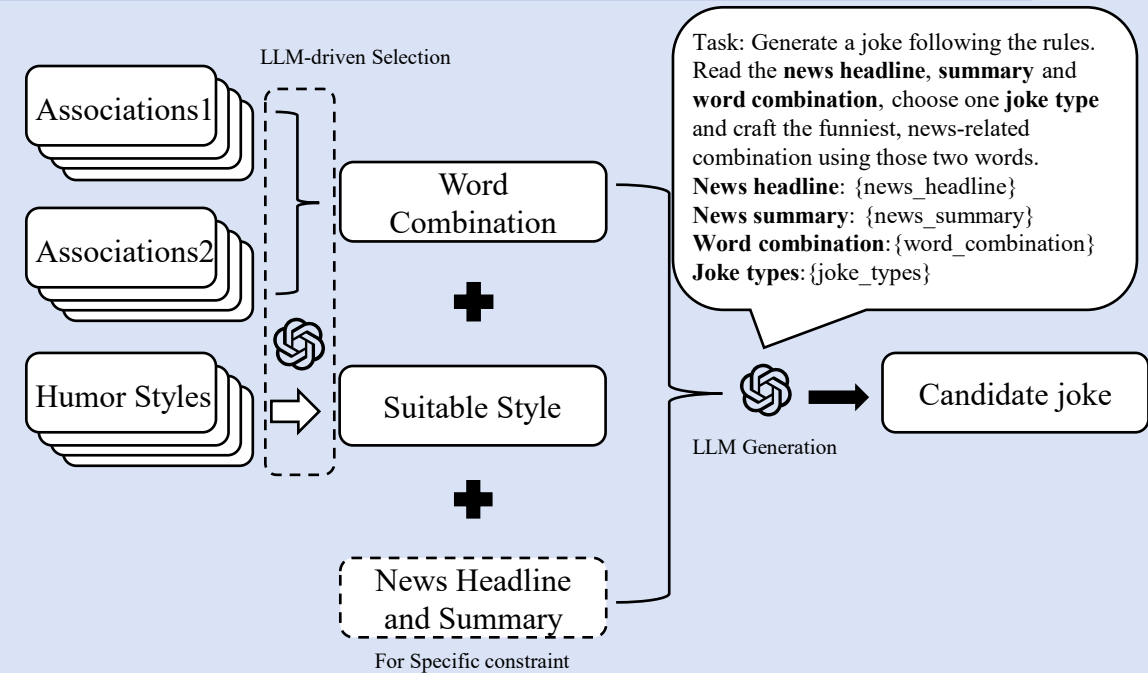

Part 4. Multi-Model Internal-External Voting-based Optimal Joke Selection

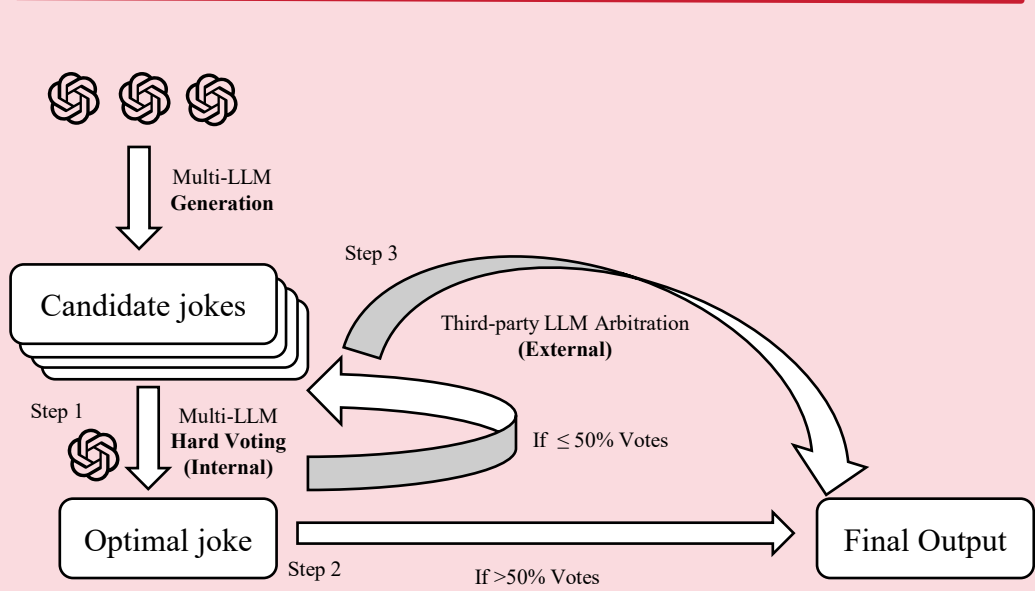

Supplement: SupplementaryMaterial [file humor-frame3.pdf › latex/fig/humor-frame3.pdf]
