# Supplementary material
Source: ML conference proceedings conference paper supplement (https://aclanthology.org/2026.semeval-1.247)

**(a) Best Joke Selection by Model (N=20)**

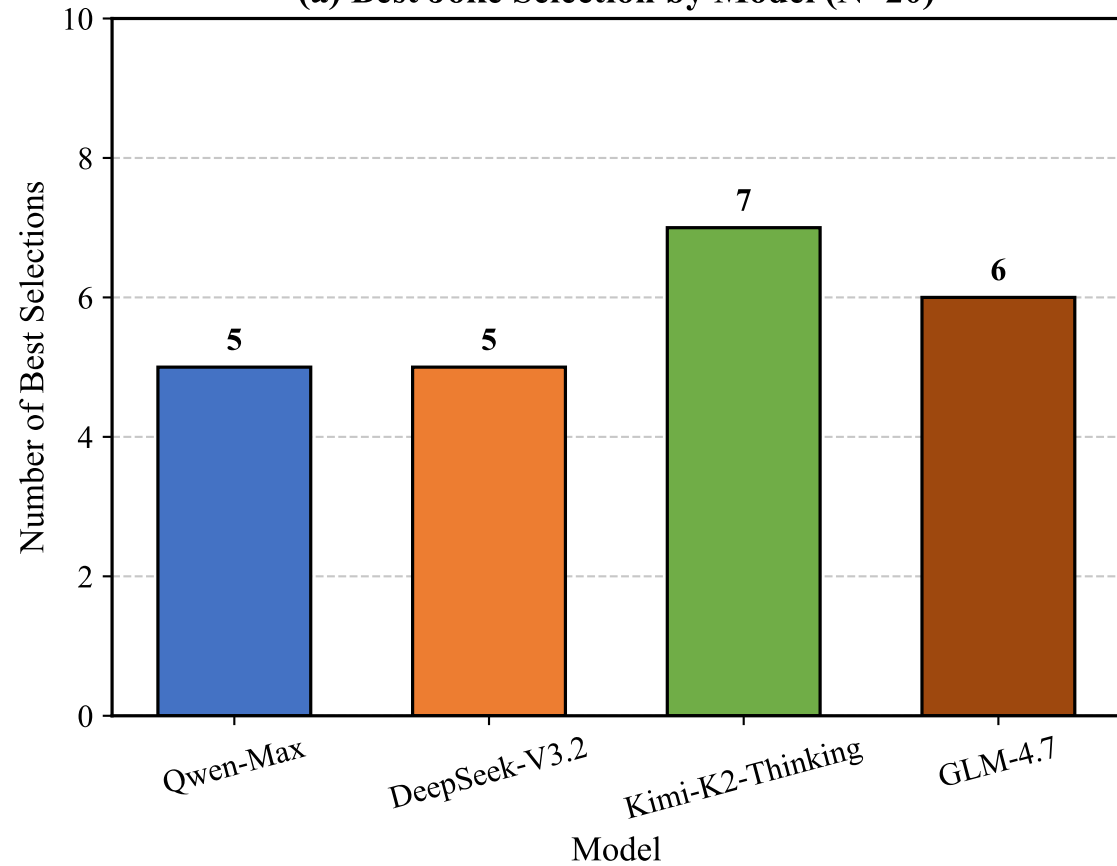

**(b) Evaluator Agreement on Humor Classification (N=20)**

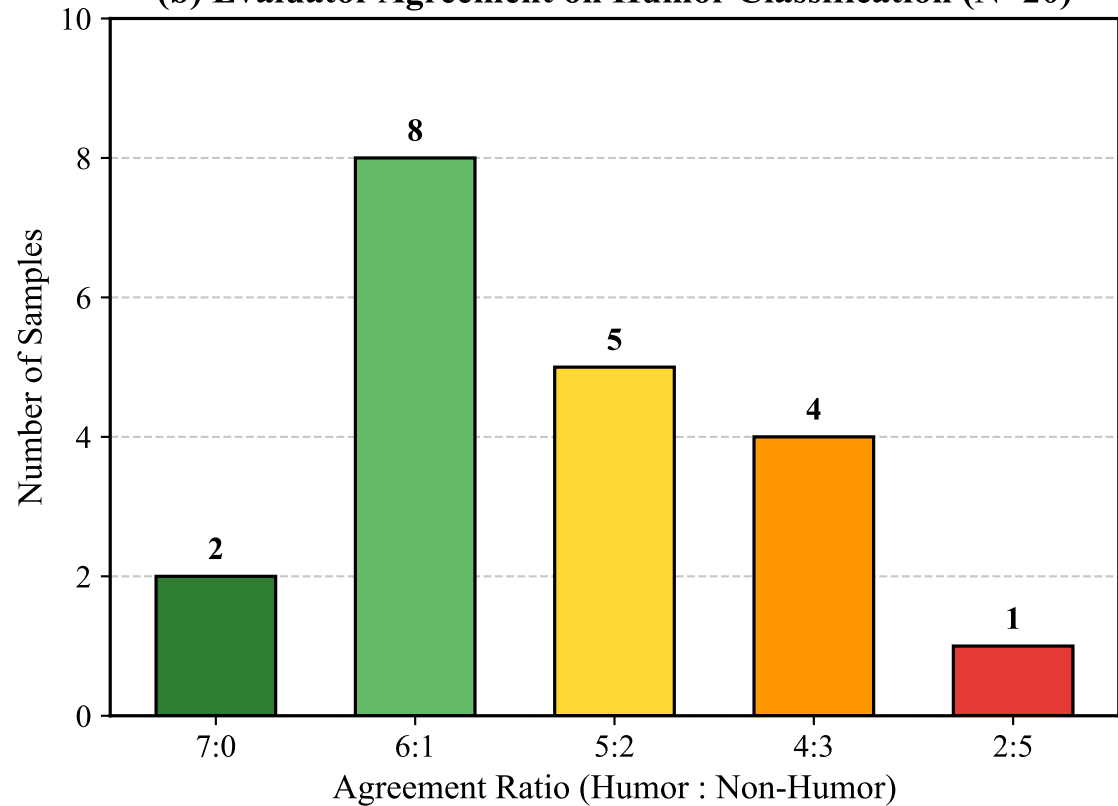

Supplement: SupplementaryMaterial [file human_evaluation_results.pdf › latex/fig/human_evaluation_results.pdf]

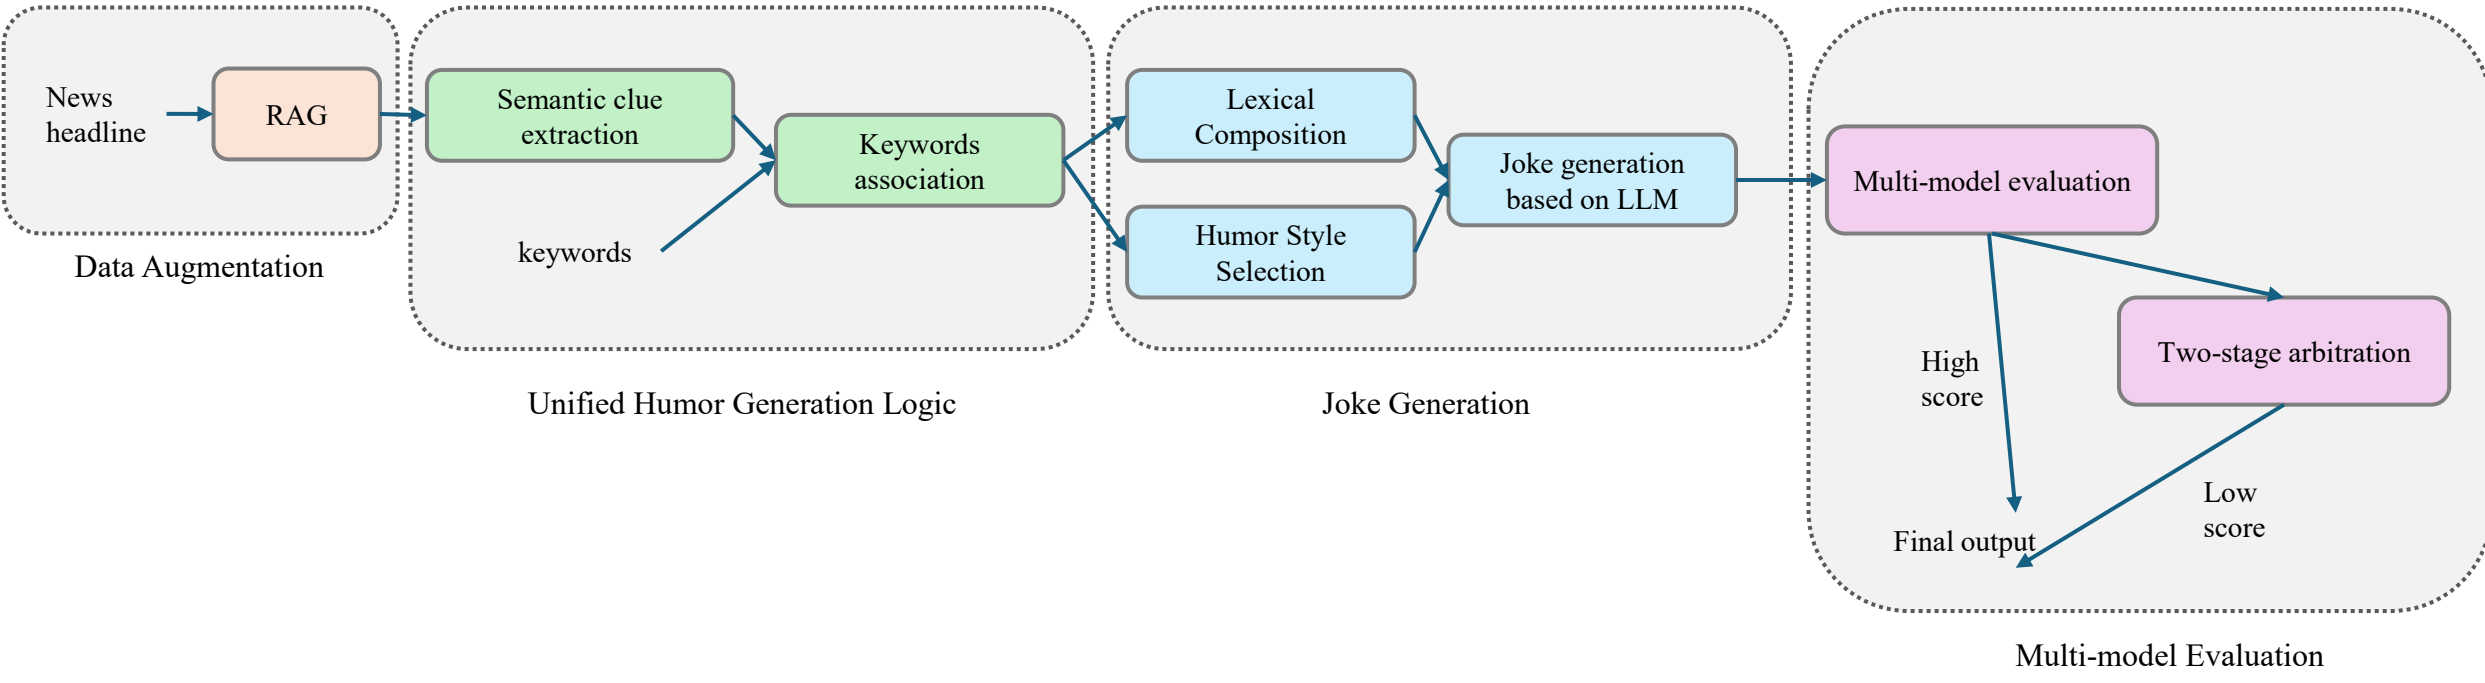

Supplement: SupplementaryMaterial [file humor-frame.pdf › latex/fig/humor-frame.pdf]

# Distribution of Best Joke Selection by Model (Initial LLM Voting, N=300)

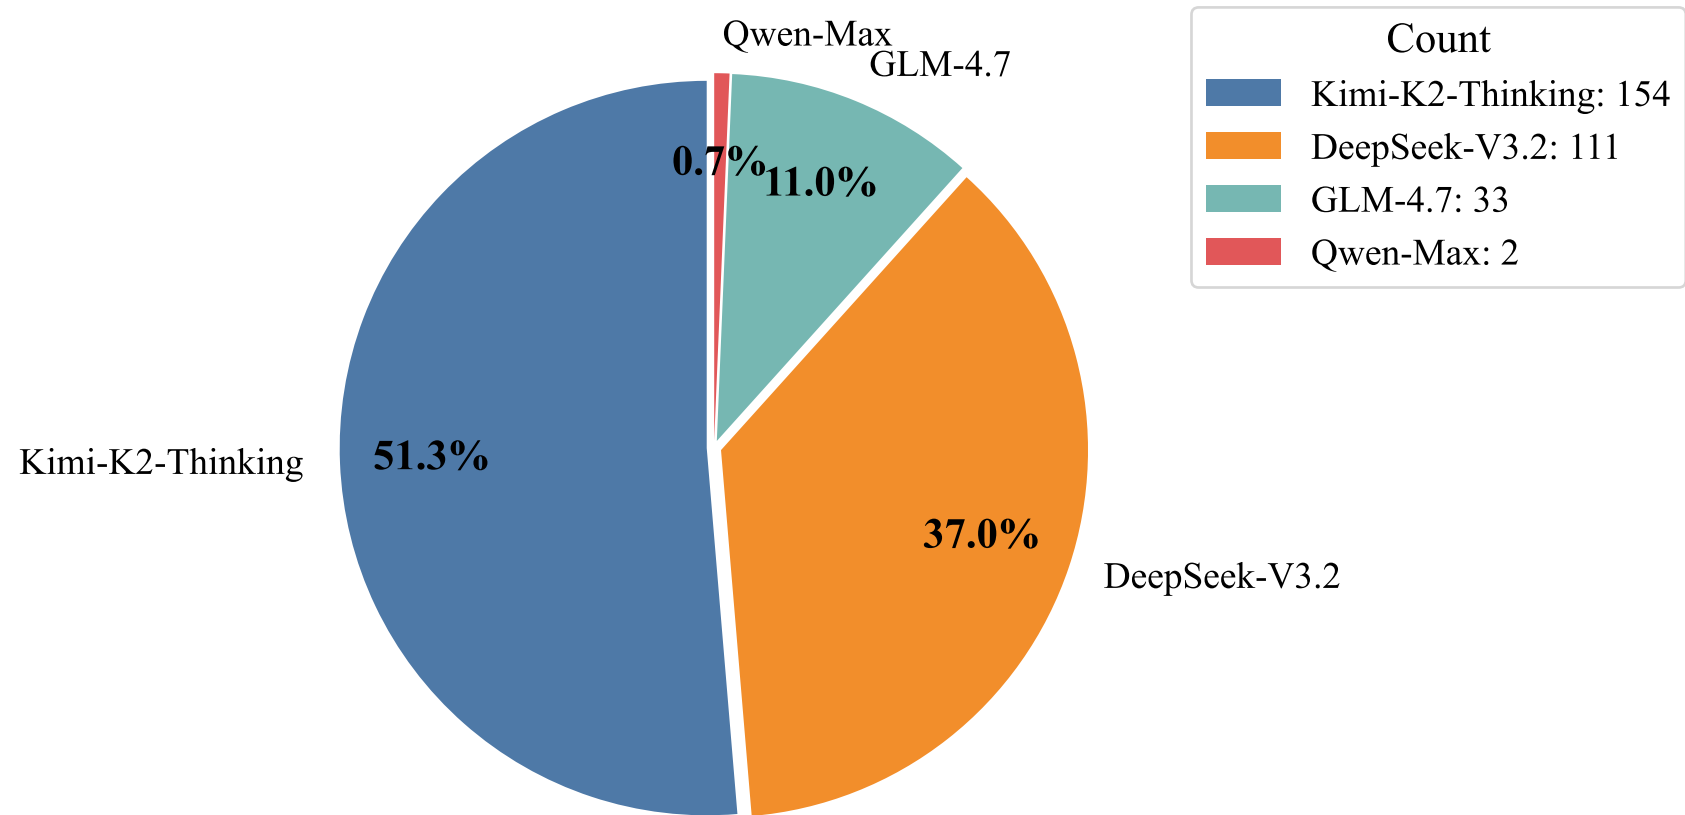

Supplement: SupplementaryMaterial [file llm_eval_chart1_initial_voting.pdf › latex/fig/llm_eval_chart1_initial_voting.pdf]

# Score Distribution of Selected Best Jokes (N=300)

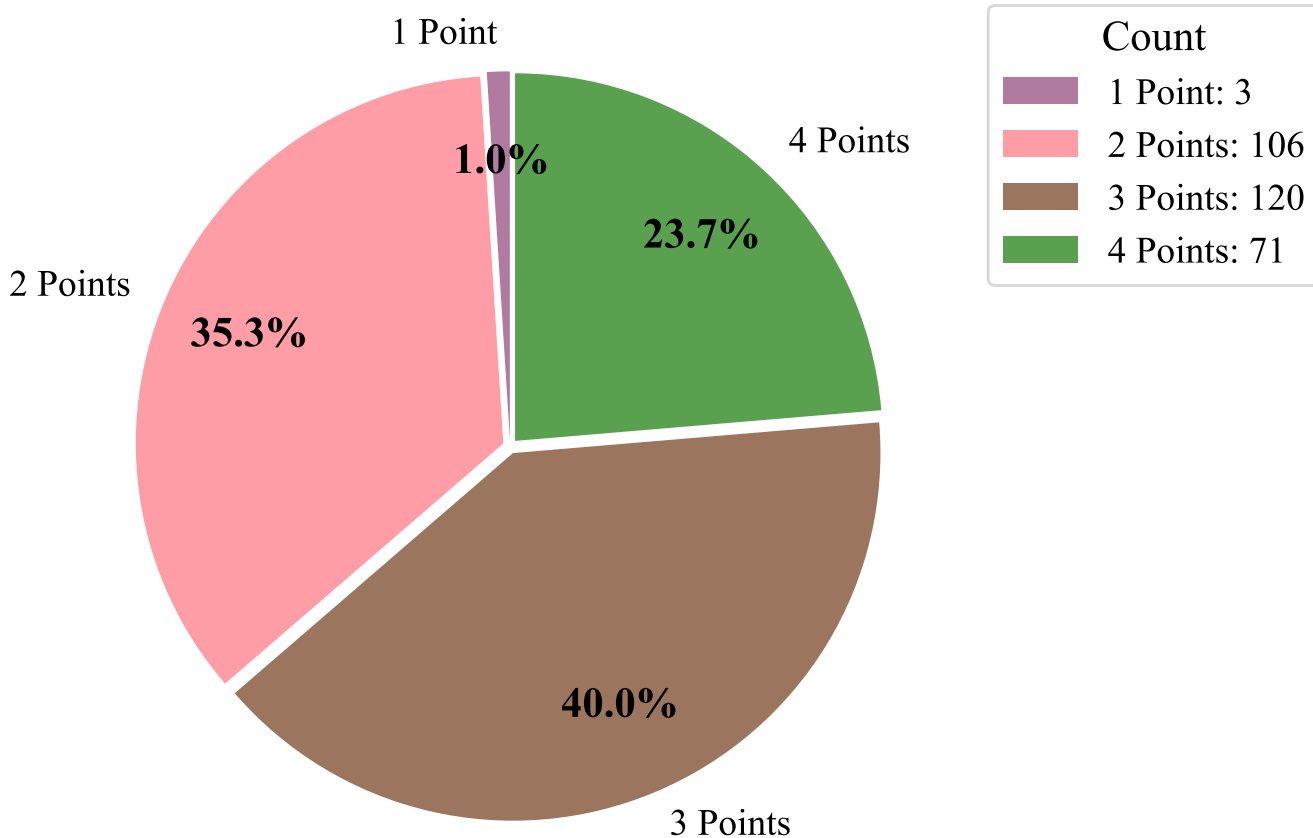

Supplement: SupplementaryMaterial [file llm_eval_chart2_score_distribution.pdf › latex/fig/llm_eval_chart2_score_distribution.pdf]

# Distribution of Best Joke Selection by Model (After GPT-5.2 Arbitration, N=300)

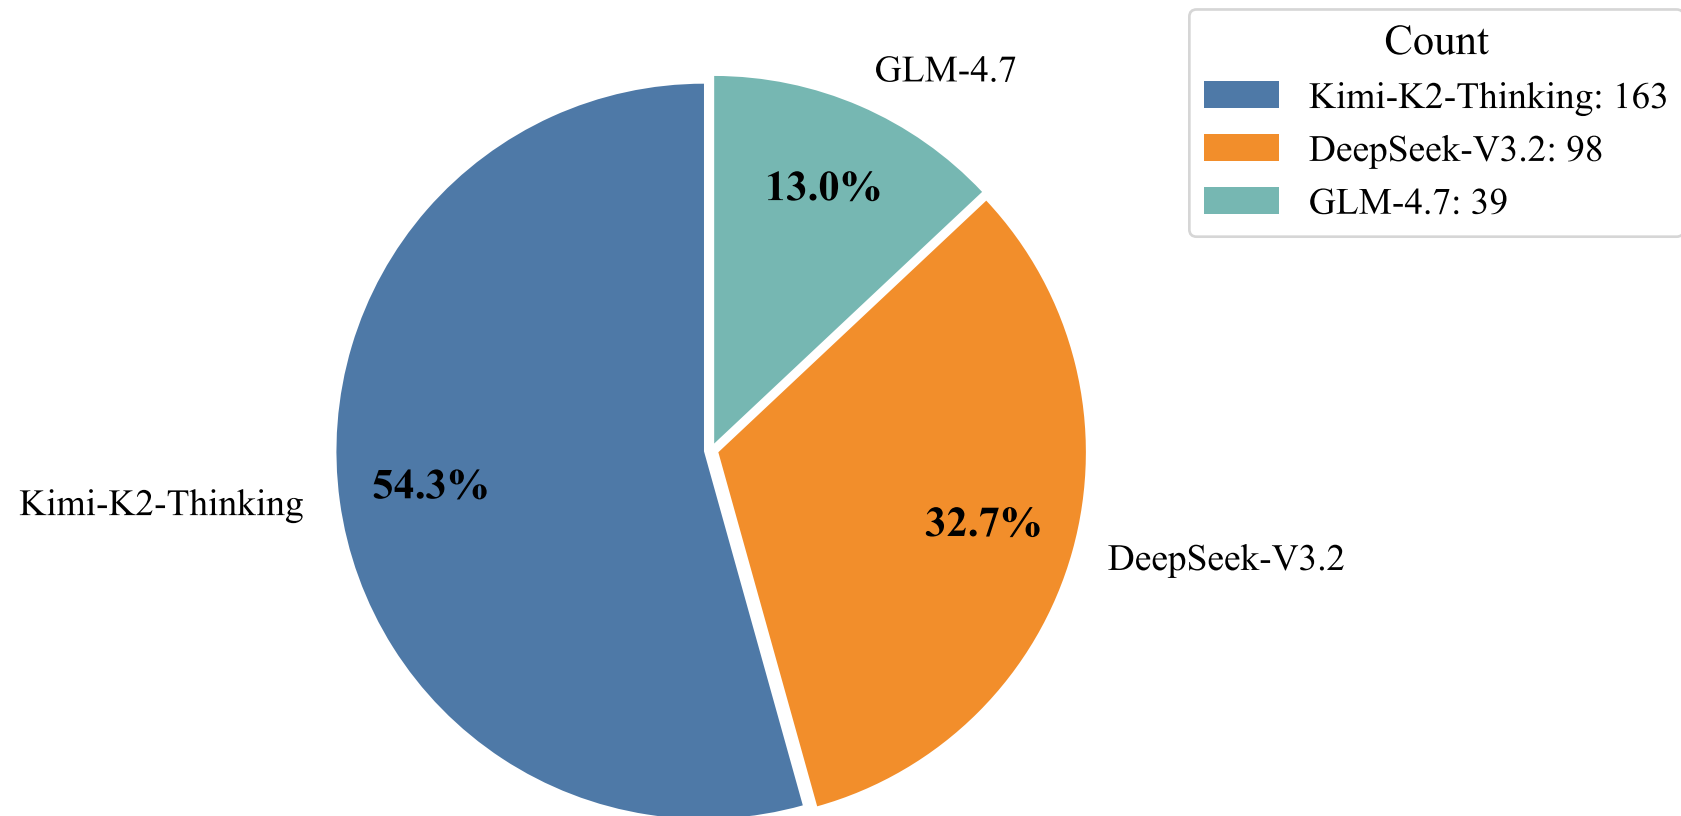

Supplement: SupplementaryMaterial [file llm_eval_chart3_after_arbitration.pdf › latex/fig/llm_eval_chart3_after_arbitration.pdf]
